# Supplementary material for: A novel ferroptosis-related genes model for prognosis prediction of lung adenocarcinoma
Source: Springer Nature journal article supplement (doi:10.1186/s12890-021-01588-2), 2021-07-13
Supplement: MOESM1 [file 19357168]

Schoenfeld Individual Test p: 0.5452

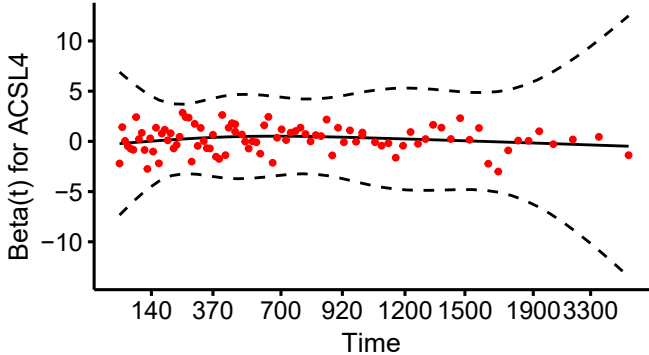

Schoenfeld Individual Test p: 0.6066

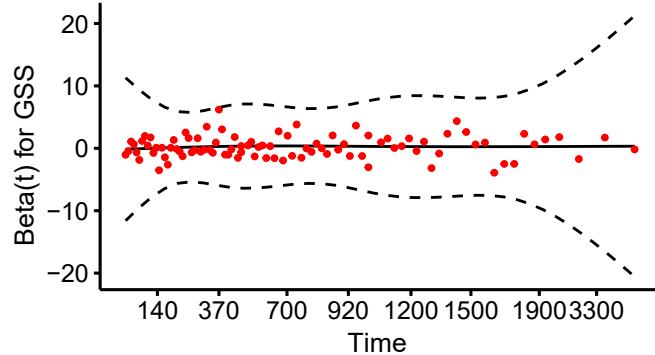

Schoenfeld Individual Test p: 0.2605

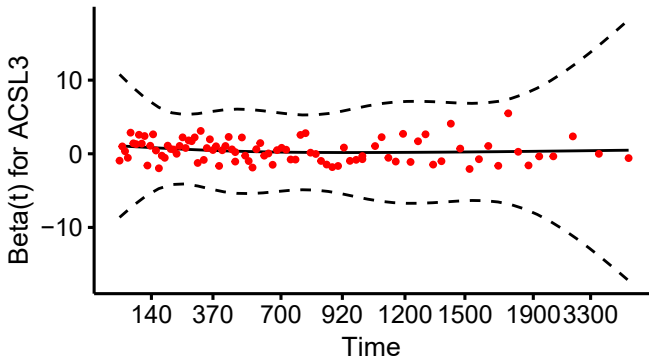

Schoenfeld Individual Test p: 0.4921

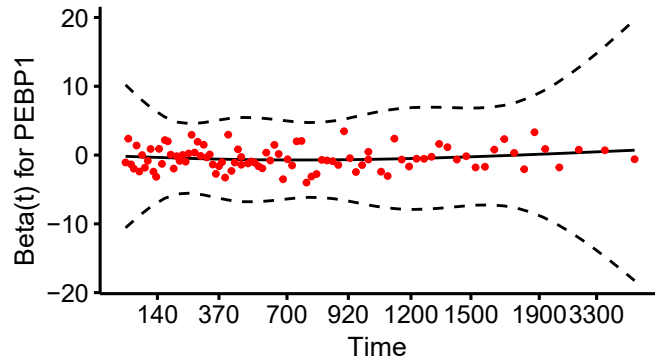

Schoenfeld Individual Test p: 0.8018

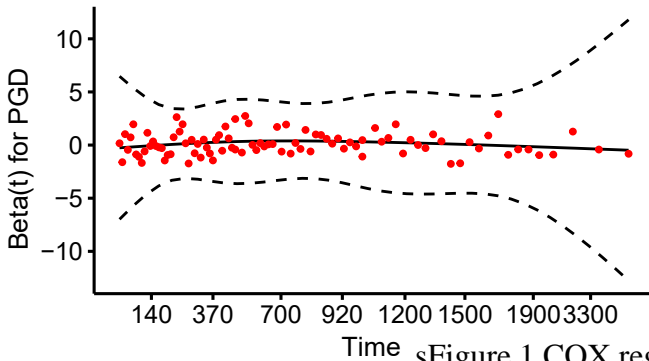

Figure 1 COX regression PH hypothesis test for each candidate.
