# Supplementary material for: A novel ferroptosis-related genes model for prognosis prediction of lung adenocarcinoma
Source: Springer Nature journal article supplement (doi:10.1186/s12890-021-01588-2), 2021-07-13
Supplement: MOESM2 [file 19357168]

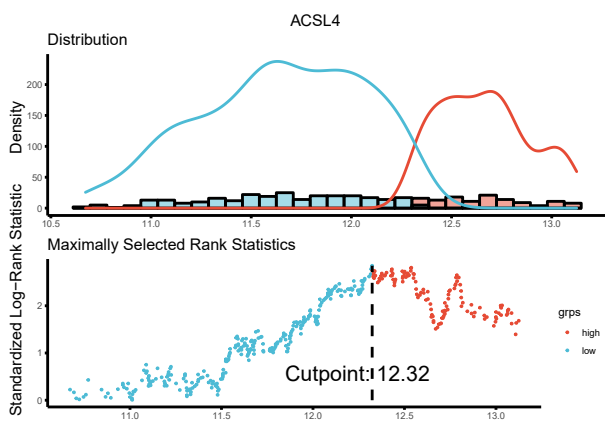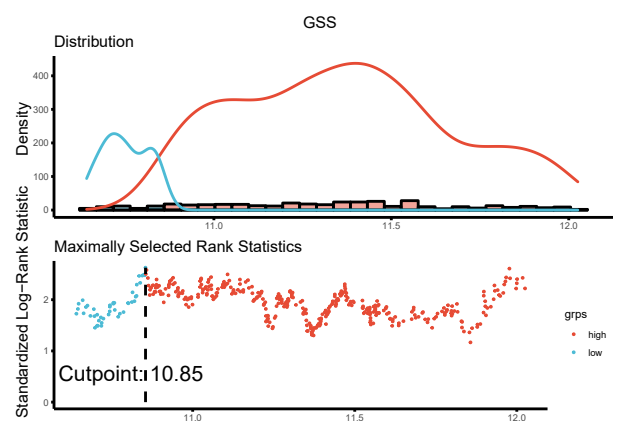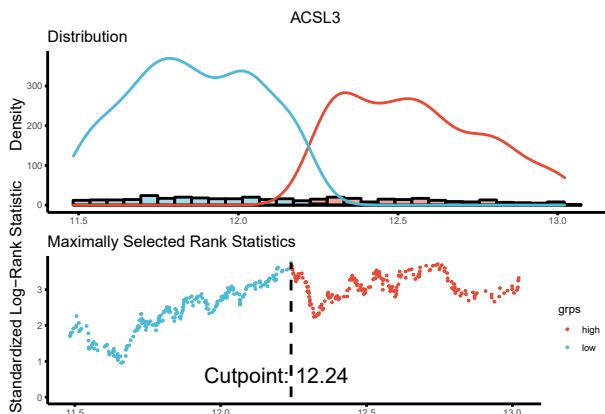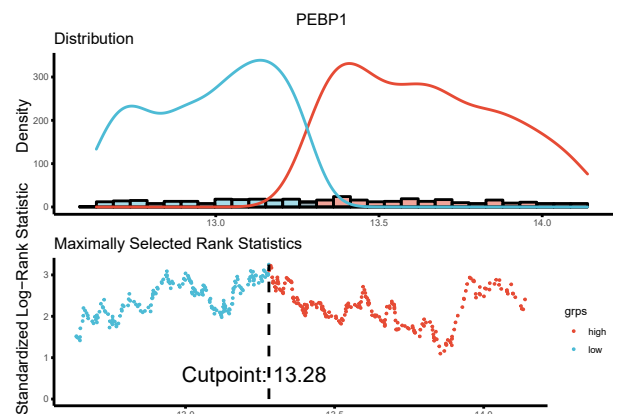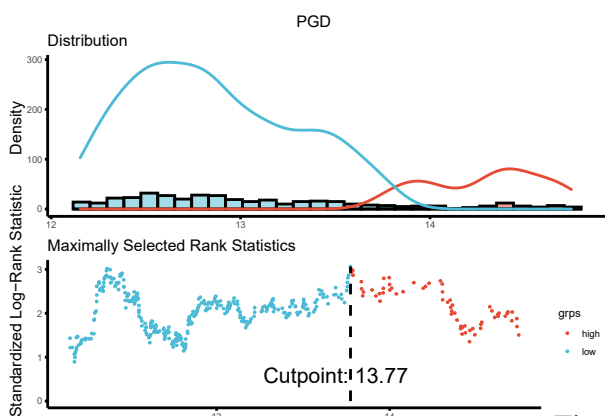

Figure 2 Gene expression threshold setting.
