# Supplementary material for: A novel ferroptosis-related genes model for prognosis prediction of lung adenocarcinoma
Source: BMC Pulm Med. 2021 Jul 13;21:229. doi: 10.1186/s12890-021-01588-2 (PMC8276441; doi:10.1186/s12890-021-01588-2)
Supplement: Supplementary file 8 — Additional file 8: Supplementary table 4. Pathway enrichment results of DEGs between high risk group and low risk group. [file 12890_2021_1588_MOESM8_ESM.xlsx]

## Sheet: KEGG_enrich_result
ID	Description	GeneRatio	BgRatio	pvalue	p.adjust	qvalue	geneID	Count
hsa04080	Neuroactive ligand-receptor interaction	34/291	340/7946	7.31873e-08	1.78577e-05	1.65634e-05	TAC4/HRH3/RXFP2/PRLHR/CRH/PRLH/GRIK3/P2RX2/CHRNA2/ADRA1A/PENK/GRIA1/PLG/SCTR/CHRM1/EDN3/CALCA/HTR2C/GABRA3/LEP/TAC3/CGA/GABRG2/TAC1/F2RL2/GIP/IAPP/NPW/GABRA2/F2/PRSS3/KNG1/NTSR1/NTS	34
hsa00140	Steroid hormone biosynthesis	12/291	60/7946	1.3439e-06	0.00014589	0.000135316	HSD17B6/CYP21A2/HSD3B1/AKR1C3/UGT1A7/UGT1A6/AKR1C1/AKR1C2/UGT1A10/AKR1C4/UGT1A1/UGT1A3	12
hsa05150	Staphylococcus aureus infection	15/291	96/7946	1.79373e-06	0.00014589	0.000135316	DEFA5/PLG/KRT24/KRT33B/DEFB4A/DEFB4B/DEFB1/KRT33A/KRT13/KRT34/KRT14/KRT9/KRT16/KRT20/KRT17	15
hsa00980	Metabolism of xenobiotics by cytochrome P450	12/291	76/7946	1.76298e-05	0.00107542	0.000997477	ADH1B/CYP2F1/UGT1A7/UGT1A6/CBR3/AKR1C1/UGT1A10/ADH4/CYP2B6/ALDH3A1/UGT1A1/UGT1A3	12
hsa00830	Retinol metabolism	11/291	67/7946	2.71321e-05	0.00132404	0.00122808	HSD17B6/ADH1B/RPE65/CYP2C18/UGT1A7/UGT1A6/UGT1A10/ADH4/CYP2B6/UGT1A1/UGT1A3	11
hsa04657	IL-17 signaling pathway	13/291	94/7946	3.41694e-05	0.00138955	0.00128884	MMP3/CCL7/DEFB4A/DEFB4B/MMP1/MUC5B/FOSL1/CXCL5/S100A8/S100A9/S100A7A/MUC5AC/S100A7	13
hsa00590	Arachidonic acid metabolism	10/291	63/7946	8.49551e-05	0.00296129	0.00274667	PLA2G1B/ALOX15/PLA2G4F/PLA2G12B/AKR1C3/CYP4F2/CBR3/GPX2/CYP2B6/CYP4F3	10
hsa00040	Pentose and glucuronate interconversions	7/291	34/7946	0.000188686	0.00575493	0.00533784	UGDH/UGT1A7/UGT1A6/UGT1A10/UGT1A1/UGT1A3/AKR1B10	7
hsa04610	Complement and coagulation cascades	11/291	85/7946	0.000250782	0.00629504	0.0058388	C6/PLG/F11/SERPIND1/CR2/F13B/F5/F2RL2/FGA/F2/KNG1	11
hsa00790	Folate biosynthesis	6/291	26/7946	0.000283793	0.00629504	0.0058388	AKR1C3/ALPP/TH/ALPI/PAH/AKR1B10	6
hsa04950	Maturity onset diabetes of the young	6/291	26/7946	0.000283793	0.00629504	0.0058388	NEUROD1/NEUROG3/PAX4/PDX1/IAPP/HNF4A	6
hsa00053	Ascorbate and aldarate metabolism	6/291	27/7946	0.000353784	0.00719361	0.00667224	UGDH/UGT1A7/UGT1A6/UGT1A10/UGT1A1/UGT1A3	6
hsa05204	Chemical carcinogenesis	10/291	82/7946	0.000770065	0.0144535	0.013406	ADH1B/CYP2C18/UGT1A7/UGT1A6/AKR1C2/UGT1A10/ADH4/ALDH3A1/UGT1A1/UGT1A3	10
hsa00982	Drug metabolism - cytochrome P450	9/291	72/7946	0.00117353	0.0204529	0.0189706	ADH1B/UGT1A7/UGT1A6/UGT1A10/ADH4/CYP2B6/ALDH3A1/UGT1A1/UGT1A3	9
hsa04915	Estrogen signaling pathway	12/291	138/7946	0.00459477	0.0700813	0.0650021	ADCY8/KRT24/KRT33B/KRT33A/KRT13/KRT34/KRT14/KRT9/KRT16/TFF1/KRT20/KRT17	12
hsa04976	Bile secretion	8/291	72/7946	0.0045955	0.0700813	0.0650021	SLC10A2/ADCY8/SCTR/SLCO1B3/SLC2A1/SLCO1B1/NR1H4/ABCC2	8
hsa03320	PPAR signaling pathway	8/291	76/7946	0.00638563	0.0916526	0.0850099	ADIPOQ/FABP3/RXRG/FABP4/FABP2/APOC3/MMP1/PCK1	8
hsa00350	Tyrosine metabolism	5/291	36/7946	0.00945291	0.128139	0.118852	ADH1B/TH/HGD/ADH4/ALDH3A1	5
hsa04742	Taste transduction	8/291	83/7946	0.0107299	0.137794	0.127807	SCN3A/ADCY8/P2RX2/TAS1R1/TAS2R60/GABRA3/HCN4/GABRA2	8
hsa04975	Fat digestion and absorption	5/291	41/7946	0.0162076	0.197733	0.183402	PLA2G1B/LIPF/PLA2G12B/CEL/FABP2	5
hsa00860	Porphyrin and chlorophyll metabolism	5/291	42/7946	0.0178633	0.201992	0.187352	UGT1A7/UGT1A6/UGT1A10/UGT1A1/UGT1A3	5
hsa04918	Thyroid hormone synthesis	7/291	74/7946	0.0182124	0.201992	0.187352	ADCY8/SERPINA7/SLC26A4/CGA/SLC5A5/ALB/GPX2	7
hsa00591	Linoleic acid metabolism	4/291	29/7946	0.0203307	0.215682	0.20005	PLA2G1B/ALOX15/PLA2G4F/PLA2G12B	4
hsa05322	Systemic lupus erythematosus	10/291	133/7946	0.0238497	0.242471	0.224898	ELANE/C6/HIST1H4B/HIST1H2BF/HIST1H2BO/HIST1H2AD/HIST1H2BM/HIST1H2BB/HIST1H4L/HIST1H4F	10
hsa00052	Galactose metabolism	4/291	31/7946	0.025447	0.248363	0.230362	LCT/MGAM2/AKR1B10/G6PC	4
hsa04913	Ovarian steroidogenesis	5/291	49/7946	0.0326041	0.298751	0.277098	ADCY8/PLA2G4F/HSD3B1/AKR1C3/CGA	5
hsa05146	Amoebiasis	8/291	102/7946	0.0330585	0.298751	0.277098	SERPINB10/CD1B/SERPINB13/LAMC2/SERPINB4/IL1R2/SERPINB3/MUC2	8
hsa04911	Insulin secretion	7/291	86/7946	0.037685	0.328398	0.304597	CAMK2B/ADCY8/ABCC8/PDX1/RIMS2/SLC2A1/GIP	7
hsa04920	Adipocytokine signaling pathway	6/291	69/7946	0.0399821	0.336401	0.31202	ADIPOQ/RXRG/LEP/SLC2A1/PCK1/G6PC	6
hsa00480	Glutathione metabolism	5/291	56/7946	0.053264	0.433214	0.401816	PGD/G6PD/GCLM/GCLC/GPX2	5
hsa04216	Ferroptosis	4/291	40/7946	0.0573615	0.437381	0.405681	ALOX15/GCLM/GCLC/SLC7A11	4
hsa05033	Nicotine addiction	4/291	40/7946	0.0573615	0.437381	0.405681	GRIA1/GABRA3/GABRG2/GABRA2	4
hsa00592	alpha-Linolenic acid metabolism	3/291	25/7946	0.0617149	0.456316	0.423244	PLA2G1B/PLA2G4F/PLA2G12B	3
hsa04972	Pancreatic secretion	7/291	102/7946	0.0798411	0.56716	0.526054	CLCA1/PLA2G1B/ADCY8/SCTR/PLA2G12B/CEL/PRSS3	7
hsa02010	ABC transporters	4/291	45/7946	0.0813549	0.56716	0.526054	ABCC12/ABCC8/DEFB1/ABCC2	4
hsa04927	Cortisol synthesis and secretion	5/291	65/7946	0.088835	0.602104	0.558465	KCNA4/ADCY8/CYP21A2/HSD3B1/NR0B1	5
hsa00030	Pentose phosphate pathway	3/291	30/7946	0.0955201	0.616667	0.571973	PGD/G6PD/TKTL1	3
hsa05226	Gastric cancer	9/291	149/7946	0.0960383	0.616667	0.571973	FGF21/RXRG/FGF9/CDH17/FZD10/FGF5/CDX2/MUC2/REG4	9
hsa00010	Glycolysis / Gluconeogenesis	5/291	68/7946	0.102881	0.643667	0.597017	ADH1B/PCK1/ADH4/ALDH3A1/G6PC	5
hsa00730	Thiamine metabolism	2/291	16/7946	0.114544	0.698718	0.648078	ALPP/ALPI	2
hsa00360	Phenylalanine metabolism	2/291	17/7946	0.126805	0.736679	0.683287	PAH/ALDH3A1	2
hsa00910	Nitrogen metabolism	2/291	17/7946	0.126805	0.736679	0.683287	CA1/CPS1	2
hsa05034	Alcoholism	10/291	184/7946	0.137513	0.780304	0.723751	CRH/HIST1H4B/HIST1H2BF/TH/HIST1H2BO/HIST1H2AD/HIST1H2BM/HIST1H2BB/HIST1H4L/HIST1H4F	10
hsa04152	AMPK signaling pathway	7/291	120/7946	0.15041	0.822582	0.762964	ADIPOQ/ADRA1A/LEP/HNF4A/PCK1/PPP2R2C/G6PC	7
hsa04640	Hematopoietic cell lineage	6/291	99/7946	0.15458	0.822582	0.762964	IL5RA/CR2/CD1B/FCER2/IL1A/IL1R2	6
hsa05014	Amyotrophic lateral sclerosis (ALS)	4/291	57/7946	0.155095	0.822582	0.762964	GRIA1/PRPH/NEFL/GPX2	4
hsa04750	Inflammatory mediator regulation of TRP channels	6/291	100/7946	0.159756	0.822582	0.762964	CAMK2B/ADCY8/PLA2G4F/HTR2C/TRPA1/KNG1	6
hsa00983	Drug metabolism - other enzymes	5/291	79/7946	0.162797	0.822582	0.762964	UGT1A7/UGT1A6/UGT1A10/UGT1A1/UGT1A3	5
hsa00100	Steroid biosynthesis	2/291	20/7946	0.165191	0.822582	0.762964	CEL/CYP24A1	2
hsa04024	cAMP signaling pathway	11/291	216/7946	0.168639	0.822959	0.763314	CAMK2B/ADCY8/GRIA1/CNGA4/CHRM1/EDN3/CNGA3/FXYD1/HCN4/CGA/GIP	11
hsa00561	Glycerolipid metabolism	4/291	61/7946	0.183845	0.879573	0.815825	LIPF/CEL/PNLIPRP3/AKR1B10	4
hsa04270	Vascular smooth muscle contraction	7/291	132/7946	0.209437	0.982743	0.911518	PLA2G1B/ADCY8/ADRA1A/EDN3/PLA2G4F/PLA2G12B/CALCA	7
hsa04540	Gap junction	5/291	88/7946	0.219983	0.999991	0.927515	GJD2/ADCY8/TUBA3E/HTR2C/TUBA3C	5
hsa04310	Wnt signaling pathway	8/291	160/7946	0.232388	0.999991	0.927515	CAMK2B/LGR5/RSPO1/FOSL1/FZD10/DKK1/DKK4/RSPO3	8
hsa04930	Type II diabetes mellitus	3/291	46/7946	0.236849	0.999991	0.927515	ADIPOQ/ABCC8/PDX1	3
hsa04724	Glutamatergic synapse	6/291	114/7946	0.239197	0.999991	0.927515	SLC1A7/GRIK3/ADCY8/GRIA1/PLA2G4F/SLC1A6	6
hsa03015	mRNA surveillance pathway	5/291	91/7946	0.240288	0.999991	0.927515	PABPC1L2B/PABPC1L2A/NXF2B/NXF5/PPP2R2C	5
hsa05202	Transcriptional misregulation in cancer	9/291	186/7946	0.241996	0.999991	0.927515	ELANE/RXRG/MYCN/MMP3/HMGA2/HOXA11/IL1R2/SSX1/TLX3	9
hsa00565	Ether lipid metabolism	3/291	47/7946	0.246716	0.999991	0.927515	PLA2G1B/PLA2G4F/PLA2G12B	3
hsa04973	Carbohydrate digestion and absorption	3/291	47/7946	0.246716	0.999991	0.927515	LCT/MGAM2/G6PC	3
hsa00270	Cysteine and methionine metabolism	3/291	49/7946	0.266628	0.999991	0.927515	BHMT/GCLM/GCLC	3
hsa00650	Butanoate metabolism	2/291	28/7946	0.273719	0.999991	0.927515	ACSM2B/ACSM4	2
hsa04721	Synaptic vesicle cycle	4/291	78/7946	0.319828	0.999991	0.927515	SLC1A7/SLC6A4/SLC1A6/CPLX2	4
hsa04923	Regulation of lipolysis in adipocytes	3/291	55/7946	0.327192	0.999991	0.927515	ADCY8/FABP4/CGA	3
hsa04934	Cushing syndrome	7/291	155/7946	0.340309	0.999991	0.927515	KCNA4/CRH/CAMK2B/ADCY8/CYP21A2/HSD3B1/FZD10	7
hsa05020	Prion diseases	2/291	35/7946	0.368757	0.999991	0.927515	C6/IL1A	2
hsa04730	Long-term depression	3/291	60/7946	0.377704	0.999991	0.927515	CRH/GRIA1/PLA2G4F	3
hsa00500	Starch and sucrose metabolism	2/291	36/7946	0.381993	0.999991	0.927515	MGAM2/G6PC	2
hsa04060	Cytokine-cytokine receptor interaction	12/291	294/7946	0.39176	0.999991	0.927515	IL5RA/IL37/CCL7/IL1A/LEP/IFNE/IL36RN/IL1R2/CXCL5/IFNK/IL20RB/INHA	12
hsa00760	Nicotinate and nicotinamide metabolism	2/291	37/7946	0.39511	0.999991	0.927515	NT5C1A/NAMPT	2
hsa04020	Calcium signaling pathway	8/291	193/7946	0.411656	0.999991	0.927515	TNNC2/CAMK2B/ADCY8/P2RX2/ADRA1A/CHRM1/HTR2C/NTSR1	8
hsa04727	GABAergic synapse	4/291	89/7946	0.412012	0.999991	0.927515	ADCY8/GABRA3/GABRG2/GABRA2	4
hsa04726	Serotonergic synapse	5/291	115/7946	0.413421	0.999991	0.927515	SLC6A4/ALOX15/PLA2G4F/HTR2C/CYP2C18	5
hsa04970	Salivary secretion	4/291	90/7946	0.420317	0.999991	0.927515	ADCY8/ADRA1A/DMBT1/MUC5B	4
hsa04530	Tight junction	7/291	169/7946	0.424865	0.999991	0.927515	CLDN2/CD1B/TUBA3E/GATA4/PPP2R2C/CLDN6/TUBA3C	7
hsa05032	Morphine addiction	4/291	91/7946	0.428594	0.999991	0.927515	ADCY8/GABRA3/GABRG2/GABRA2	4
hsa04912	GnRH signaling pathway	4/291	93/7946	0.445054	0.999991	0.927515	CAMK2B/ADCY8/PLA2G4F/CGA	4
hsa05323	Rheumatoid arthritis	4/291	93/7946	0.445054	0.999991	0.927515	MMP3/IL1A/MMP1/CXCL5	4
hsa04720	Long-term potentiation	3/291	67/7946	0.446903	0.999991	0.927515	CAMK2B/ADCY8/GRIA1	3
hsa04924	Renin secretion	3/291	69/7946	0.466137	0.999991	0.927515	CLCA1/REN/EDN3	3
hsa05031	Amphetamine addiction	3/291	69/7946	0.466137	0.999991	0.927515	CAMK2B/GRIA1/TH	3
hsa00120	Primary bile acid biosynthesis	1/291	17/7946	0.47002	0.999991	0.927515	AKR1C4	1
hsa00450	Selenocompound metabolism	1/291	17/7946	0.47002	0.999991	0.927515	TXNRD1	1
hsa04940	Type I diabetes mellitus	2/291	43/7946	0.470856	0.999991	0.927515	IL1A/PTPRN	2
hsa00564	Glycerophospholipid metabolism	4/291	97/7946	0.477516	0.999991	0.927515	PLA2G1B/GPD1/PLA2G4F/PLA2G12B	4
hsa00071	Fatty acid degradation	2/291	44/7946	0.482928	0.999991	0.927515	ADH1B/ADH4	2
hsa04925	Aldosterone synthesis and secretion	4/291	98/7946	0.48552	0.999991	0.927515	CAMK2B/ADCY8/CYP21A2/HSD3B1	4
hsa05218	Melanoma	3/291	72/7946	0.494418	0.999991	0.927515	FGF21/FGF9/FGF5	3
hsa04061	Viral protein interaction with cytokine and cytokine receptor	4/291	100/7946	0.501379	0.999991	0.927515	IL37/CCL7/CXCL5/IL20RB	4
hsa00770	Pantothenate and CoA biosynthesis	1/291	19/7946	0.508209	0.999991	0.927515	VNN1	1
hsa01230	Biosynthesis of amino acids	3/291	75/7946	0.52194	0.999991	0.927515	CPS1/TKTL1/PAH	3
hsa04971	Gastric acid secretion	3/291	75/7946	0.52194	0.999991	0.927515	CAMK2B/ADCY8/GAST	3
hsa00220	Arginine biosynthesis	1/291	21/7946	0.543656	0.999991	0.927515	CPS1	1
hsa04922	Glucagon signaling pathway	4/291	106/7946	0.547608	0.999991	0.927515	CAMK2B/SLC2A1/PCK1/G6PC	4
hsa04928	Parathyroid hormone synthesis, secretion and action	4/291	106/7946	0.547608	0.999991	0.927515	CASR/ADCY8/RXRG/CYP24A1	4
hsa04217	Necroptosis	6/291	162/7946	0.547826	0.999991	0.927515	CAMK2B/ALOX15/PLA2G4F/RNF103-CHMP3/IL1A/HIST1H2AD	6
hsa04979	Cholesterol metabolism	2/291	50/7946	0.551657	0.999991	0.927515	APOH/APOC3	2
hsa04066	HIF-1 signaling pathway	4/291	109/7946	0.569875	0.999991	0.927515	EIF4E1B/CAMK2B/ANGPT4/SLC2A1	4
hsa00340	Histidine metabolism	1/291	23/7946	0.576556	0.999991	0.927515	ALDH3A1	1
hsa04614	Renin-angiotensin system	1/291	23/7946	0.576556	0.999991	0.927515	REN	1
hsa04964	Proximal tubule bicarbonate reclamation	1/291	23/7946	0.576556	0.999991	0.927515	PCK1	1
hsa04725	Cholinergic synapse	4/291	112/7946	0.591522	0.999991	0.927515	SLC5A7/CAMK2B/ADCY8/CHRM1	4
hsa04977	Vitamin digestion and absorption	1/291	24/7946	0.592109	0.999991	0.927515	CBLIF	1
hsa05164	Influenza A	6/291	170/7946	0.595425	0.999991	0.927515	PLG/NXF2B/NXF5/IL1A/TMPRSS11D/PRSS3	6
hsa05016	Huntington disease	7/291	199/7946	0.597966	0.999991	0.927515	DNAI2/DNAI1/DNAH9/DNAH12/DNAH10/COX7B2/GPX2	7
hsa05203	Viral carcinogenesis	7/291	201/7946	0.608594	0.999991	0.927515	HIST1H4B/HIST1H2BF/HIST1H2BO/HIST1H2BM/HIST1H2BB/HIST1H4L/HIST1H4F	7
hsa04014	Ras signaling pathway	8/291	232/7946	0.620412	0.999991	0.927515	FGF21/PLA2G1B/ANGPT4/FGF9/PLA2G4F/PLA2G12B/VEGFD/FGF5	8
hsa01200	Carbon metabolism	4/291	117/7946	0.626144	0.999991	0.927515	PGD/G6PD/CPS1/TKTL1	4
hsa04723	Retrograde endocannabinoid signaling	5/291	148/7946	0.636226	0.999991	0.927515	ADCY8/GRIA1/GABRA3/GABRG2/GABRA2	5
hsa04211	Longevity regulating pathway	3/291	89/7946	0.638575	0.999991	0.927515	EIF4E1B/ADIPOQ/ADCY8	3
hsa04919	Thyroid hormone signaling pathway	4/291	119/7946	0.639461	0.999991	0.927515	DIO1/RXRG/GATA4/SLC2A1	4
hsa04261	Adrenergic signaling in cardiomyocytes	5/291	149/7946	0.642144	0.999991	0.927515	CAMK2B/ADCY8/ADRA1A/CACNG7/PPP2R2C	5
hsa04151	PI3K-Akt signaling pathway	12/291	354/7946	0.651523	0.999991	0.927515	THBS4/EIF4E1B/FGF21/ANGPT4/FGF9/CHRM1/VEGFD/LAMC2/PCK1/FGF5/PPP2R2C/G6PC	12
hsa04621	NOD-like receptor signaling pathway	6/291	181/7946	0.656297	0.999991	0.927515	CASR/DEFA5/NAMPT/DEFB4A/DEFB4B/CARD18	6
hsa04611	Platelet activation	4/291	124/7946	0.671386	0.999991	0.927515	ADCY8/PLA2G4F/FGA/F2	4
hsa00020	Citrate cycle (TCA cycle)	1/291	30/7946	0.674169	0.999991	0.927515	PCK1	1
hsa04929	GnRH secretion	2/291	64/7946	0.685961	0.999991	0.927515	TRPC5/CGA	2
hsa00410	beta-Alanine metabolism	1/291	31/7946	0.686146	0.999991	0.927515	ALDH3A1	1
hsa00512	Mucin type O-glycan biosynthesis	1/291	31/7946	0.686146	0.999991	0.927515	GALNT4	1
hsa01523	Antifolate resistance	1/291	31/7946	0.686146	0.999991	0.927515	ABCC2	1
hsa04713	Circadian entrainment	3/291	97/7946	0.695667	0.999991	0.927515	CAMK2B/ADCY8/GRIA1	3
hsa05215	Prostate cancer	3/291	97/7946	0.695667	0.999991	0.927515	KLK3/MMP3/IL1R2	3
hsa04926	Relaxin signaling pathway	4/291	129/7946	0.701321	0.999991	0.927515	RXFP2/ADCY8/VEGFD/MMP1	4
hsa00230	Purine metabolism	4/291	130/7946	0.707067	0.999991	0.927515	ADCY8/NT5C1A/ALLC/GDA	4
hsa00051	Fructose and mannose metabolism	1/291	33/7946	0.708802	0.999991	0.927515	AKR1B10	1
hsa03410	Base excision repair	1/291	33/7946	0.708802	0.999991	0.927515	NEIL3	1
hsa04728	Dopaminergic synapse	4/291	131/7946	0.712733	0.999991	0.927515	CAMK2B/GRIA1/TH/PPP2R2C	4
hsa04630	JAK-STAT signaling pathway	5/291	162/7946	0.713491	0.999991	0.927515	IL5RA/LEP/IFNE/IFNK/IL20RB	5
hsa04933	AGE-RAGE signaling pathway in diabetic complications	3/291	100/7946	0.715245	0.999991	0.927515	AGER/VEGFD/IL1A	3
hsa04916	Melanogenesis	3/291	101/7946	0.721552	0.999991	0.927515	CAMK2B/ADCY8/FZD10	3
hsa05230	Central carbon metabolism in cancer	2/291	69/7946	0.725248	0.999991	0.927515	G6PD/SLC2A1	2
hsa03013	RNA transport	5/291	165/7946	0.728451	0.999991	0.927515	PABPC1L2B/EIF4E1B/PABPC1L2A/NXF2B/NXF5	5
hsa04622	RIG-I-like receptor signaling pathway	2/291	70/7946	0.732589	0.999991	0.927515	IFNE/IFNK	2
hsa04917	Prolactin signaling pathway	2/291	70/7946	0.732589	0.999991	0.927515	TH/CGA	2
hsa00250	Alanine, aspartate and glutamate metabolism	1/291	36/7946	0.739765	0.999991	0.927515	CPS1	1
hsa04210	Apoptosis	4/291	136/7946	0.739863	0.999991	0.927515	CTSH/TUBA3E/CTSV/TUBA3C	4
hsa03008	Ribosome biogenesis in eukaryotes	3/291	105/7946	0.745697	0.999991	0.927515	NXF2B/NXF5/RMRP	3
hsa04115	p53 signaling pathway	2/291	72/7946	0.746774	0.999991	0.927515	ADGRB1/SERPINB5	2
hsa05143	African trypanosomiasis	1/291	37/7946	0.749339	0.999991	0.927515	KNG1	1
hsa05216	Thyroid cancer	1/291	37/7946	0.749339	0.999991	0.927515	RXRG	1
hsa04931	Insulin resistance	3/291	108/7946	0.762691	0.999991	0.927515	SLC2A1/PCK1/G6PC	3
hsa00620	Pyruvate metabolism	1/291	39/7946	0.767446	0.999991	0.927515	PCK1	1
hsa05133	Pertussis	2/291	76/7946	0.773216	0.999991	0.927515	IL1A/CXCL5	2
hsa00260	Glycine, serine and threonine metabolism	1/291	40/7946	0.776005	0.999991	0.927515	BHMT	1
hsa05412	Arrhythmogenic right ventricular cardiomyopathy (ARVC)	2/291	77/7946	0.779439	0.999991	0.927515	CACNG7/PKP2	2
hsa04668	TNF signaling pathway	3/291	112/7946	0.78391	0.999991	0.927515	VEGFD/MMP3/CXCL5	3
hsa05219	Bladder cancer	1/291	41/7946	0.784249	0.999991	0.927515	MMP1	1
hsa05332	Graft-versus-host disease	1/291	41/7946	0.784249	0.999991	0.927515	IL1A	1
hsa04612	Antigen processing and presentation	2/291	78/7946	0.785513	0.999991	0.927515	KLRC3/KLRC2	2
hsa04015	Rap1 signaling pathway	6/291	210/7946	0.787554	0.999991	0.927515	FGF21/ANGPT4/ADCY8/FGF9/VEGFD/FGF5	6
hsa03018	RNA degradation	2/291	79/7946	0.79144	0.999991	0.927515	PABPC1L2B/PABPC1L2A	2
hsa00380	Tryptophan metabolism	1/291	42/7946	0.792191	0.999991	0.927515	KYNU	1
hsa05224	Breast cancer	4/291	147/7946	0.792663	0.999991	0.927515	FGF21/FGF9/FZD10/FGF5	4
hsa05132	Salmonella infection	2/291	80/7946	0.797222	0.999991	0.927515	IL1A/LBP	2
hsa04810	Regulation of actin cytoskeleton	6/291	213/7946	0.798654	0.999991	0.927515	FGF21/FGF9/CHRM1/FGF5/F2/KNG1	6
hsa04932	Non-alcoholic fatty liver disease (NAFLD)	4/291	149/7946	0.801281	0.999991	0.927515	ADIPOQ/IL1A/LEP/COX7B2	4
hsa04962	Vasopressin-regulated water reabsorption	1/291	44/7946	0.807212	0.999991	0.927515	AQP2	1
hsa04071	Sphingolipid signaling pathway	3/291	119/7946	0.817267	0.999991	0.927515	PPP2R2C/CERS3/KNG1	3
hsa04921	Oxytocin signaling pathway	4/291	153/7946	0.817649	0.999991	0.927515	CAMK2B/ADCY8/PLA2G4F/CACNG7	4
hsa00514	Other types of O-glycan biosynthesis	1/291	46/7946	0.821151	0.999991	0.927515	GALNT4	1
hsa04012	ErbB signaling pathway	2/291	85/7946	0.824057	0.999991	0.927515	CAMK2B/NRG4	2
hsa00600	Sphingolipid metabolism	1/291	47/7946	0.827739	0.999991	0.927515	CERS3	1
hsa04260	Cardiac muscle contraction	2/291	86/7946	0.829026	0.999991	0.927515	CACNG7/COX7B2	2
hsa00520	Amino sugar and nucleotide sugar metabolism	1/291	48/7946	0.834085	0.999991	0.927515	UGDH	1
hsa04512	ECM-receptor interaction	2/291	88/7946	0.838589	0.999991	0.927515	THBS4/LAMC2	2
hsa05030	Cocaine addiction	1/291	49/7946	0.840198	0.999991	0.927515	TH	1
hsa00330	Arginine and proline metabolism	1/291	50/7946	0.846087	0.999991	0.927515	PRODH2	1
hsa05144	Malaria	1/291	50/7946	0.846087	0.999991	0.927515	THBS4	1
hsa04010	MAPK signaling pathway	8/291	295/7946	0.853461	0.999991	0.927515	FGF21/ANGPT4/FGF9/PLA2G4F/VEGFD/IL1A/CACNG7/FGF5	8
hsa05222	Small cell lung cancer	2/291	92/7946	0.856278	0.999991	0.927515	RXRG/LAMC2	2
hsa04961	Endocrine and other factor-regulated calcium reabsorption	1/291	53/7946	0.862486	0.999991	0.927515	CALB1	1
hsa05320	Autoimmune thyroid disease	1/291	53/7946	0.862486	0.999991	0.927515	CGA	1
hsa04650	Natural killer cell mediated cytotoxicity	3/291	131/7946	0.864304	0.999991	0.927515	KLRC3/RAET1L/KLRC2	3
hsa04022	cGMP-PKG signaling pathway	4/291	167/7946	0.866431	0.999991	0.927515	ADCY8/ADRA1A/GATA4/KNG1	4
hsa04974	Protein digestion and absorption	2/291	95/7946	0.868367	0.999991	0.927515	SLC15A1/PRSS3	2
hsa05130	Pathogenic Escherichia coli infection	5/291	202/7946	0.868389	0.999991	0.927515	CLDN2/TUBA3E/CLDN6/F2/TUBA3C	5
hsa05414	Dilated cardiomyopathy (DCM)	2/291	96/7946	0.872185	0.999991	0.927515	ADCY8/CACNG7	2
hsa05231	Choline metabolism in cancer	2/291	98/7946	0.879518	0.999991	0.927515	SLC5A7/PLA2G4F	2
hsa00240	Pyrimidine metabolism	1/291	57/7946	0.881675	0.999991	0.927515	NT5C1A	1
hsa04910	Insulin signaling pathway	3/291	137/7946	0.883577	0.999991	0.927515	EIF4E1B/PCK1/G6PC	3
hsa05418	Fluid shear stress and atherosclerosis	3/291	139/7946	0.889439	0.999991	0.927515	CAV3/IL1A/IL1R2	3
hsa04370	VEGF signaling pathway	1/291	59/7946	0.890244	0.999991	0.927515	PLA2G4F	1
hsa05142	Chagas disease (American trypanosomiasis)	2/291	102/7946	0.893034	0.999991	0.927515	PPP2R2C/KNG1	2
hsa00310	Lysine degradation	1/291	61/7946	0.898194	0.999991	0.927515	PRDM9	1
hsa04213	Longevity regulating pathway - multiple species	1/291	62/7946	0.901951	0.999991	0.927515	ADCY8	1
hsa05217	Basal cell carcinoma	1/291	63/7946	0.90557	0.999991	0.927515	FZD10	1
hsa04514	Cell adhesion molecules (CAMs)	3/291	147/7946	0.910337	0.999991	0.927515	CLDN2/NLGN4X/CLDN6	3
hsa05321	Inflammatory bowel disease (IBD)	1/291	65/7946	0.912414	0.999991	0.927515	IL1A	1
hsa04072	Phospholipase D signaling pathway	3/291	148/7946	0.912682	0.999991	0.927515	ADCY8/PLA2G4F/F2	3
hsa05223	Non-small cell lung cancer	1/291	66/7946	0.915648	0.999991	0.927515	RXRG	1
hsa04670	Leukocyte transendothelial migration	2/291	112/7946	0.920911	0.999991	0.927515	CLDN2/CLDN6	2
hsa04145	Phagosome	3/291	152/7946	0.921516	0.999991	0.927515	THBS4/TUBA3E/TUBA3C	3
hsa04664	Fc epsilon RI signaling pathway	1/291	68/7946	0.921763	0.999991	0.927515	PLA2G4F	1
hsa05211	Renal cell carcinoma	1/291	69/7946	0.924653	0.999991	0.927515	SLC2A1	1
hsa04390	Hippo signaling pathway	3/291	154/7946	0.92562	0.999991	0.927515	FZD10/PPP2R2C/AFP	3
hsa05160	Hepatitis C	3/291	155/7946	0.927598	0.999991	0.927515	CLDN2/PPP2R2C/CLDN6	3
hsa01524	Platinum drug resistance	1/291	73/7946	0.935187	0.999991	0.927515	ABCC2	1
hsa05100	Bacterial invasion of epithelial cells	1/291	73/7946	0.935187	0.999991	0.927515	CAV3	1
hsa04935	Growth hormone synthesis, secretion and action	2/291	119/7946	0.936199	0.999991	0.927515	ADCY8/IGFALS	2
hsa00562	Inositol phosphate metabolism	1/291	74/7946	0.937583	0.999991	0.927515	MTMR7	1
hsa04510	Focal adhesion	4/291	199/7946	0.937837	0.999991	0.927515	THBS4/CAV3/VEGFD/LAMC2	4
hsa05214	Glioma	1/291	75/7946	0.93989	0.999991	0.927515	CAMK2B	1
hsa05206	MicroRNAs in cancer	7/291	310/7946	0.941752	0.999991	0.927515	MIR34B/MIR34C/HMGA2/MIR181A2/IGF2BP1/CYP24A1/SERPINB5	7
hsa04142	Lysosome	2/291	123/7946	0.943635	0.999991	0.927515	CTSH/CTSV	2
hsa05140	Leishmaniasis	1/291	77/7946	0.944253	0.999991	0.927515	IL1A	1
hsa01521	EGFR tyrosine kinase inhibitor resistance	1/291	79/7946	0.9483	0.999991	0.927515	EIF4E1B	1
hsa04114	Oocyte meiosis	2/291	128/7946	0.951776	0.999991	0.927515	CAMK2B/ADCY8	2
hsa04380	Osteoclast differentiation	2/291	128/7946	0.951776	0.999991	0.927515	IL1A/FOSL1	2
hsa04662	B cell receptor signaling pathway	1/291	82/7946	0.953828	0.999991	0.927515	CR2	1
hsa04068	FoxO signaling pathway	2/291	131/7946	0.95611	0.999991	0.927515	PCK1/G6PC	2
hsa05166	Human T-cell leukemia virus 1 infection	4/291	219/7946	0.962664	0.999991	0.927515	ADCY8/FOSL1/SLC2A1/IL1R2	4
hsa05152	Tuberculosis	3/291	180/7946	0.963778	0.999991	0.927515	CAMK2B/IL1A/LBP	3
hsa04360	Axon guidance	3/291	181/7946	0.964792	0.999991	0.927515	CAMK2B/TRPC5/UNC5D	3
hsa05410	Hypertrophic cardiomyopathy (HCM)	1/291	90/7946	0.965856	0.999991	0.927515	CACNG7	1
hsa04550	Signaling pathways regulating pluripotency of stem cells	2/291	140/7946	0.966991	0.999991	0.927515	FZD10/ESX1	2
hsa05012	Parkinson disease	2/291	142/7946	0.96903	0.999991	0.927515	TH/COX7B2	2
hsa04666	Fc gamma R-mediated phagocytosis	1/291	93/7946	0.969512	0.999991	0.927515	PLA2G4F	1
hsa04350	TGF-beta signaling pathway	1/291	94/7946	0.970642	0.999991	0.927515	FST	1
hsa04062	Chemokine signaling pathway	3/291	189/7946	0.971996	0.999991	0.927515	ADCY8/CCL7/CXCL5	3
hsa01522	Endocrine resistance	1/291	98/7946	0.974759	0.999991	0.927515	ADCY8	1
hsa04070	Phosphatidylinositol signaling system	1/291	99/7946	0.975695	0.999991	0.927515	MTMR7	1
hsa04914	Progesterone-mediated oocyte maturation	1/291	99/7946	0.975695	0.999991	0.927515	ADCY8	1
hsa04150	mTOR signaling pathway	2/291	153/7946	0.978253	0.999991	0.927515	EIF4E1B/FZD10	2
hsa04064	NF-kappa B signaling pathway	1/291	102/7946	0.9783	0.999991	0.927515	LBP	1
hsa04620	Toll-like receptor signaling pathway	1/291	104/7946	0.97988	0.999991	0.927515	LBP	1
hsa05205	Proteoglycans in cancer	3/291	204/7946	0.981911	0.999991	0.927515	CAMK2B/CAV3/FZD10	3
hsa04659	Th17 cell differentiation	1/291	107/7946	0.982038	0.999991	0.927515	RXRG	1
hsa04218	Cellular senescence	2/291	160/7946	0.982675	0.999991	0.927515	IL1A/GATA4	2
hsa05145	Toxoplasmosis	1/291	112/7946	0.985134	0.999991	0.927515	LAMC2	1
hsa05225	Hepatocellular carcinoma	2/291	168/7946	0.986665	0.999991	0.927515	FZD10/TXNRD1	2
hsa04722	Neurotrophin signaling pathway	1/291	119/7946	0.988596	0.999991	0.927515	CAMK2B	1
hsa04714	Thermogenesis	3/291	231/7946	0.991949	0.999991	0.927515	FGF21/ADCY8/COX7B2	3
hsa00190	Oxidative phosphorylation	1/291	133/7946	0.993293	0.999991	0.927515	COX7B2	1
hsa04120	Ubiquitin mediated proteolysis	1/291	136/7946	0.994015	0.999991	0.927515	UBE2U	1
hsa04140	Autophagy - animal	1/291	137/7946	0.994238	0.999991	0.927515	PRAP1	1
hsa04371	Apelin signaling pathway	1/291	137/7946	0.994238	0.999991	0.927515	ADCY8	1
hsa05162	Measles	1/291	138/7946	0.994453	0.999991	0.927515	IL1A	1
hsa05169	Epstein-Barr virus infection	2/291	201/7946	0.99556	0.999991	0.927515	CR2/FCER2	2
hsa04740	Olfactory transduction	7/291	448/7946	0.997818	0.999991	0.927515	CAMK2B/OR10G2/CNGA4/CNGA3/OR2C3/OR51B5/OR1F1	7
hsa05165	Human papillomavirus infection	4/291	330/7946	0.998391	0.999991	0.927515	THBS4/LAMC2/FZD10/PPP2R2C	4
hsa05010	Alzheimer disease	1/291	171/7946	0.99842	0.999991	0.927515	COX7B2	1
hsa04144	Endocytosis	2/291	249/7946	0.999144	0.999991	0.927515	CAV3/RNF103-CHMP3	2
hsa05163	Human cytomegalovirus infection	1/291	225/7946	0.9998	0.999991	0.927515	ADCY8	1
hsa05168	Herpes simplex virus 1 infection	4/291	491/7946	0.999991	0.999991	0.927515	NXF2B/NXF5/ZNF716/ZNF729	4
